# Supplementary material for: Contribution of rare and common variants to intellectual disability in a sub-isolate of Northern Finland
Source: PubMed Central journal article supplement (PMC6345990; doi:10.1038/s41467-018-08262-y), 2019-01-24
Supplement: 41467_2018_8262_MOESM3_ESM.pdf [file 41467_2018_8262_MOESM3_ESM.pdf]

## **Description of Additional Supplementary Files**

### **Supplementary Data 1**

Curated developmental disorder genes and annotations from DDD study (DDG2P database) considered as known genes for cognitive phenotype (probable and confirmed with cognitive phenotype annotation). A gene can appear multiple times with different annotation by DDD study. Columns 13-6 are de novo meta-analysis results from MCRae et al, Nature 2017).

### **Supplementary Data 2**

Patients for which likely pathogenic variant was identified in exome sequencing.

### **Supplementary Data 3**

Detailed clinical information for each patient.

### **Supplementary Data 4**

Identified likely pathogenic deletions and other deletions deleting high pLI gene.

### **Supplementary Data 5**

Nominally significant dominant variants enriched in Finland.

### **Supplementary Data 6**

Nominally significant recessive variants enriched in Finland.
